# Supplementary material for: First principles study of strain effects on prospective 2D photocatalysts Sn2Se2X4 (X = P, As) with ultra-high charge carrier mobility
Source: Royal Society of Chemistry journal article supplement (doi:10.1039/d3cp05336a), 2024-01-01
Supplement: d3cp05336a1.pdf [file d3cp05336a1.pdf]

## Supplementary Materials

# First principles study of strain effects on prospective 2D photocatalysts $\text{Sn}_2\text{Se}_2\text{X}_4$ ( $\text{X} = \text{P}, \text{As}$ ) with ultra-high charge carrier mobility

Pham D. Trung,<sup>a\*</sup> and Hien D. Tong<sup>b\*</sup>

### AFFILIATIONS

<sup>a</sup> Yersin University, 27 Ton That Tung, Ward 8, Dalat City, Lam Dong Province, Vietnam.

<sup>b</sup> Faculty of Engineering, Vietnamese-German University, Binh Duong, Vietnam.

Authors to whom correspondence should be addressed: [phdtrung2018@gmail.com](mailto:phdtrung2018@gmail.com) (Pham D. Trung), [hien.td@vgu.edu.vn](mailto:hien.td@vgu.edu.vn) (Hien D. Tong)

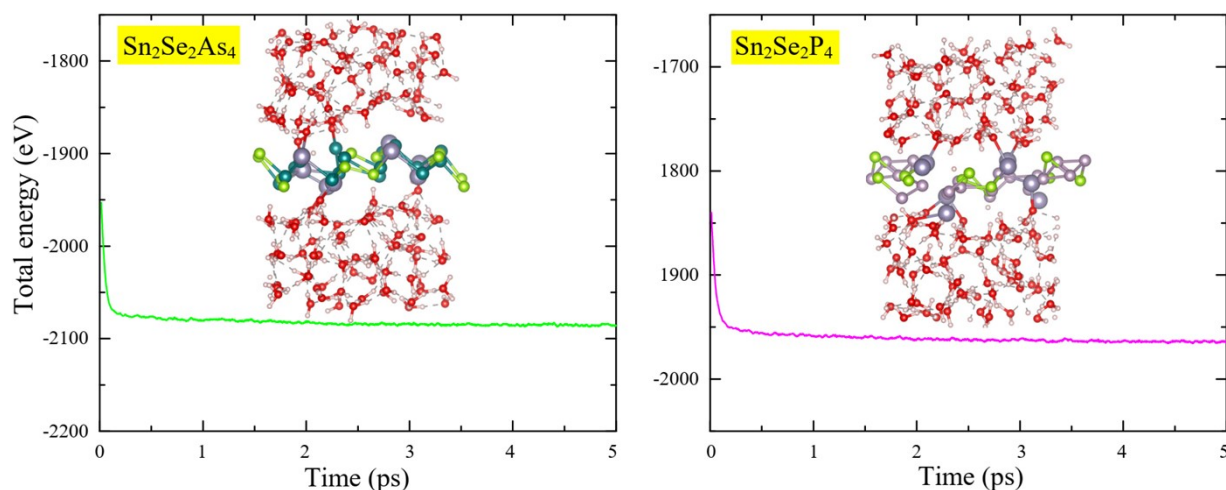

**Figure S1.** The AIMD energy fluctuations and the snapshot of equilibrium structure of  $\text{Sn}_2\text{Se}_2\text{X}_4$  ( $\text{X} = \text{P}, \text{As}$ ) monolayer in liquid water after annealing at 300 K for 5 ps.

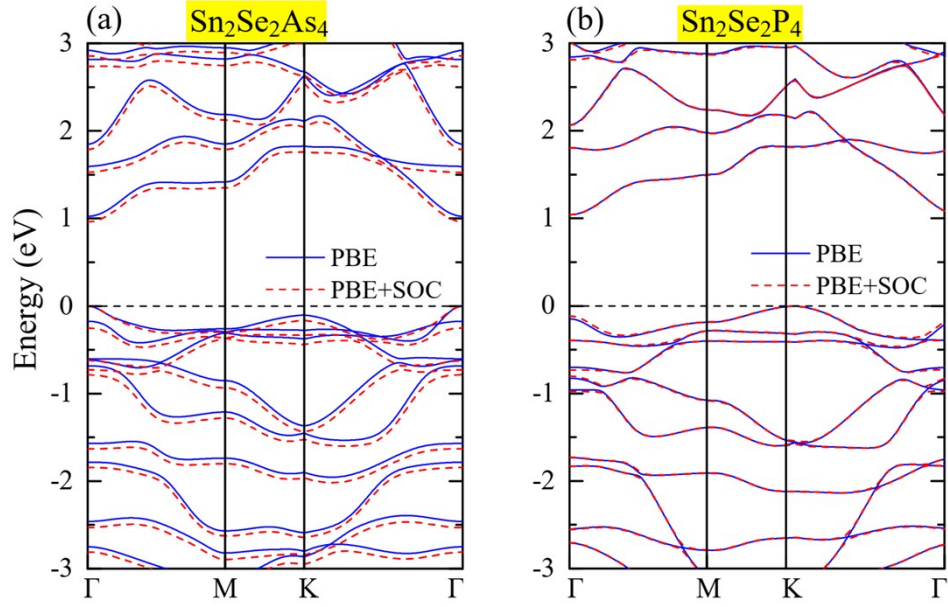

**Figure S2.** The calculated electronic band structure of the  $\text{Sn}_2\text{Se}_2\text{X}_4$  ( $\text{X} = \text{P}, \text{As}$ ) monolayers with spin-orbital coupling (SOC) (dash red curves), and without SOC (green) extracted from PBE functional.

**Table S1.** The calculated band gaps  $E_g^{\text{HSE06}}$  (eV) and the positions of the VBM and CBM of  $\text{Sn}_2\text{Se}_2\text{X}_4$  ( $\text{X} = \text{P}, \text{As}$ ) monolayers.

| Strains | $\text{Sn}_2\text{Se}_2\text{As}_4$ |        |        | $\text{Sn}_2\text{Se}_2\text{P}_4$ |        |        |
|---------|-------------------------------------|--------|--------|------------------------------------|--------|--------|
|         | $E_g^{\text{HSE06}}$                | VBM    | CBM    | $E_g^{\text{HSE06}}$               | VBM    | CBM    |
| -8%     | 1.405                               | -5.891 | -4.486 | 1.231                              | -5.653 | -4.422 |
| -6%     | 1.538                               | -5.957 | -4.420 | 1.358                              | -5.717 | -4.358 |
| -4%     | 1.655                               | -6.016 | -4.361 | 1.468                              | -5.771 | -4.303 |
| -2%     | 1.758                               | -6.067 | -4.310 | 1.556                              | -5.815 | -4.259 |
| 0%      | 1.716                               | -6.046 | -4.330 | 1.633                              | -5.854 | -4.221 |
| 2%      | 1.659                               | -6.018 | -4.359 | 1.701                              | -5.888 | -4.187 |
| 4%      | 1.613                               | -5.995 | -4.382 | 1.655                              | -5.865 | -4.210 |
| 6%      | 1.574                               | -5.975 | -4.402 | 1.604                              | -5.839 | -4.235 |
| 8%      | 1.538                               | -5.957 | -4.420 | 1.552                              | -5.813 | -4.261 |
